# Supplementary material for: High-throughput screening for modulators of cellular contractile force
Source: Royal Society of Chemistry journal article supplement (doi:10.1039/c5ib00054h), 2015-01-01
Supplement: c5ib00054h1.pdf [file c5ib00054h1.pdf]

## Supplementary Information

**Title: High-throughput screening for modulators of cellular contractile force.**

**Supplementary Figure 1: Preparation of deformable substrates in 96-well plates; an alternative method.** Acrylamide-based hydrogels (Young's modulus  $\approx 2.5\text{kPa}$ , thickness  $\approx 200\mu\text{m}$ ) were miniaturized in glass bottom 96-well plates using a multi-layered approach. Both layers had the same chemical composition with the exception of 2% wt/vol of red beads ( $0.5\mu\text{m}$  carboxylate-modified microspheres, Invitrogen) added to the top layer. The top layer was prepared exceedingly thin to promote bead dispersion within a single horizontal plane.

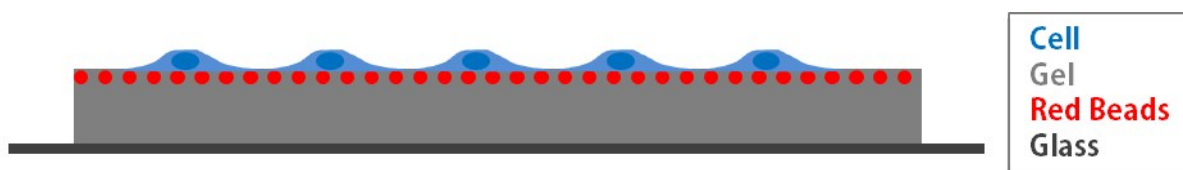

**Supplementary Figure 2: Layout of drug plate.** Each plate contained 35 different mixtures (1 to 35), vehicle control (0.5% DMSO), and three control drugs (1% FBS,  $10\mu\text{M}$  or  $25\mu\text{M}$  isoproterenol, and  $10\mu\text{M}$  or  $25\mu\text{M}$  Y27632).

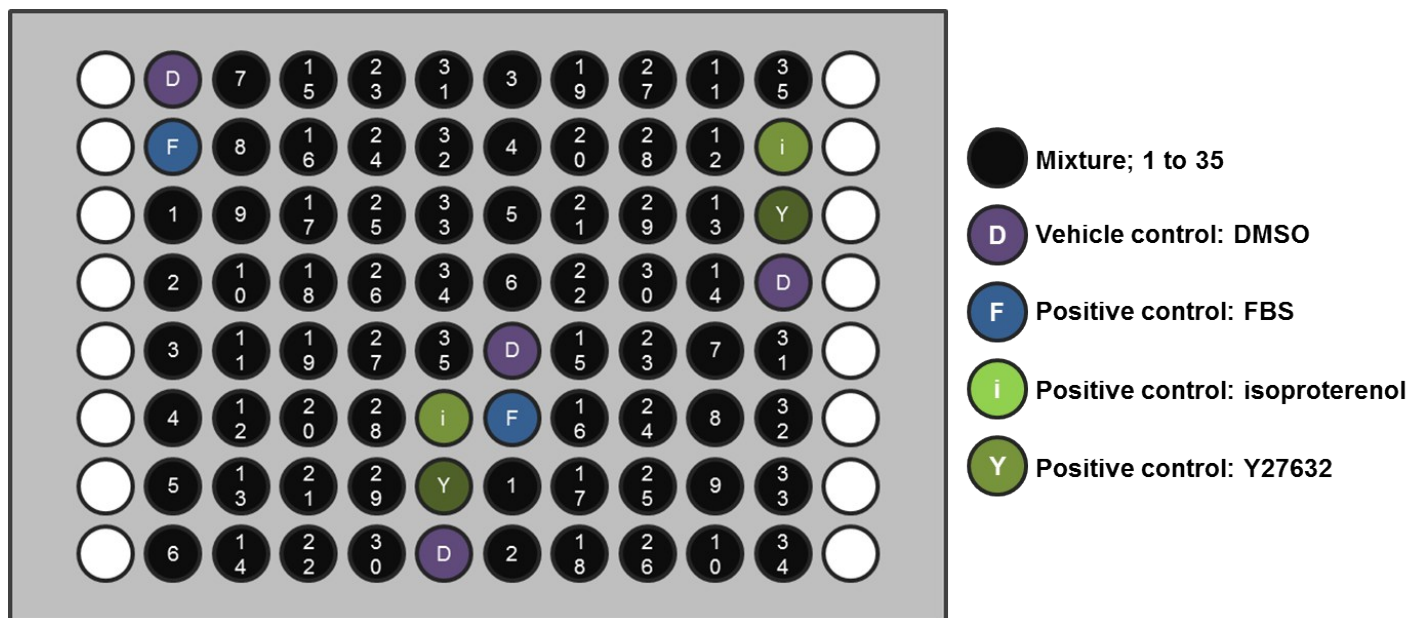

**Supplementary Figure 3: Force response ratio is a high-quality screening endpoint.** We assessed the sensitivity of CFS as a high-throughput screening assay using the robust Z'-factor value [1, 2]. Y27632 (rho kinase inhibitor, 12 $\mu$ M) was used as a positive control and water (0.01%) was used as a vehicle control. 40 positive and 40 vehicle controls were evenly distributed among 80 wells in one 96-well plate. Each symbol represents the force response ratio measured at each well. Based on these measurements, we calculated the robust Z'-factor (see Methods) and it was 0.605 which exceeds the recommended value of 0.4~0.5 for a good quality HTS screen [3, 4].

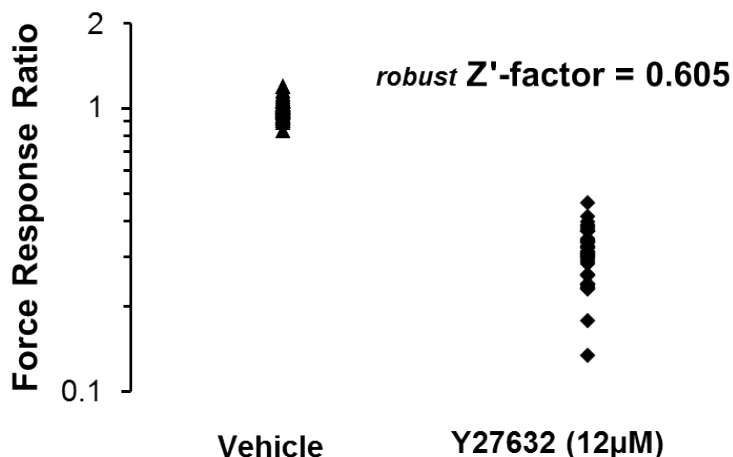

**Supplementary Figure 4: Alprostadil (prostaglandin E1) relaxes SC cells and promotes outflow function in enucleated mouse eyes.** (A) Alprostadil reduced SC contractile forces in a dose dependent fashion with greater potency than isoproterenol. EC50s were 290nM for isoproterenol and 9.1nM for alprostadil. (B) 1 $\mu$ M alprostadil increased outflow facility (inverse of flow resistance) during perfusion of enucleated mouse eyes. ( $p < 2 \times 10^{-5}$ ,  $n=11$  pairs). Plotted are the average  $\pm$  SEM.

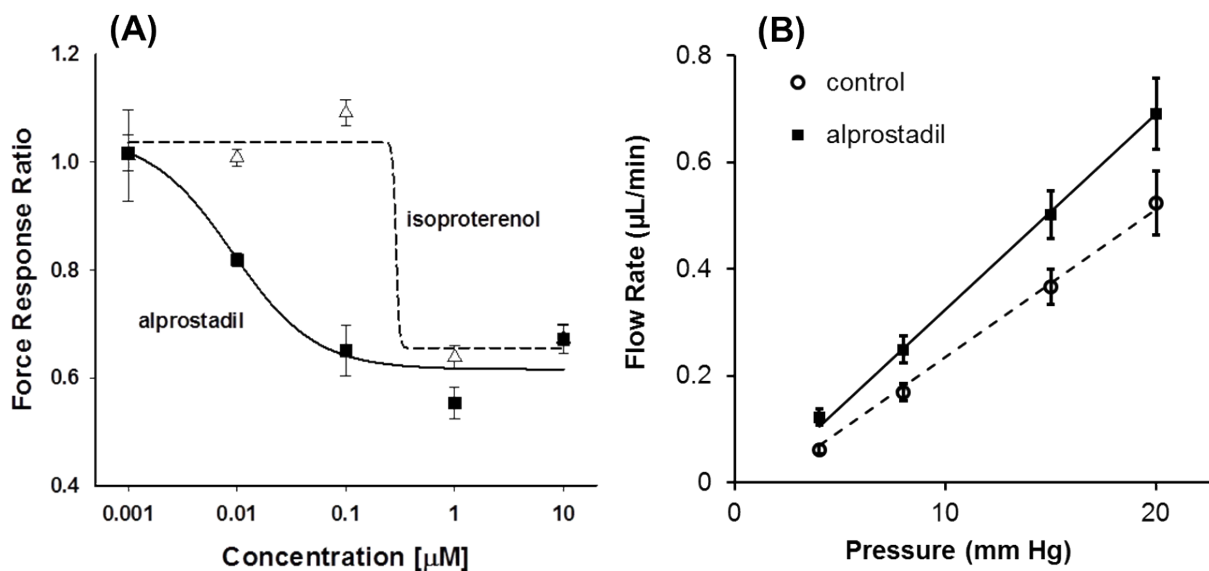

**Supplementary Figure 5: High-throughput implementation of CFS.** Using the Chembridge Diverset<sup>®</sup> library, we confirmed CFS throughput by screening 10,000 compounds within 4 weeks. The estimation is based on 96-well based assay plates, quadruplicate measurements, and 1hr drug incubation.

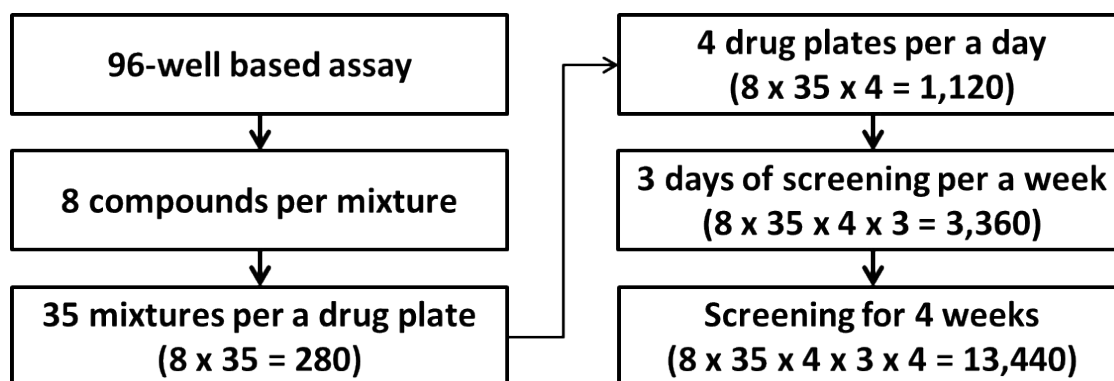

**Supplementary Figure 6: Secondary validation for novel bronchodilator hits identified by CFS.** (A) The 2 hits found from the Chembridge Diverset<sup>®</sup> did not affect cell viability depicted as the fluorescence intensity measured using a standard alamar Blue<sup>®</sup> assay (n=8 wells per compound per dose; 1% triton-X and 0.5% DMSO were used as negative and vehicle controls, respectively). (B) Both hit compounds reduced cellular contractile force in a dose dependent manner (n=8 wells per compound per dose). EC50s were  $3.63 \pm 1.37 \mu\text{M}$  for hit #1 and  $3.33 \pm 0.32 \mu\text{M}$  for hit #2. Plotted are the average  $\pm$  SD.

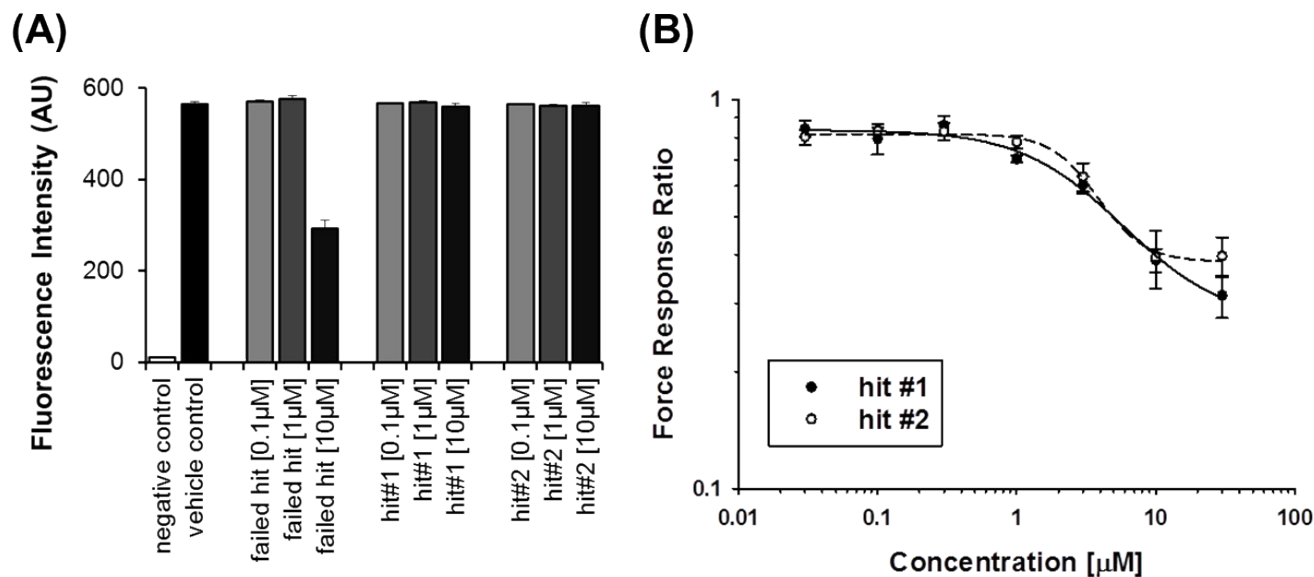

**Supplementary Figure 7:** Schematic of gel making in a multi-well plate. This figure was reproduced from Ref [5] (Ref 30 in the main text).

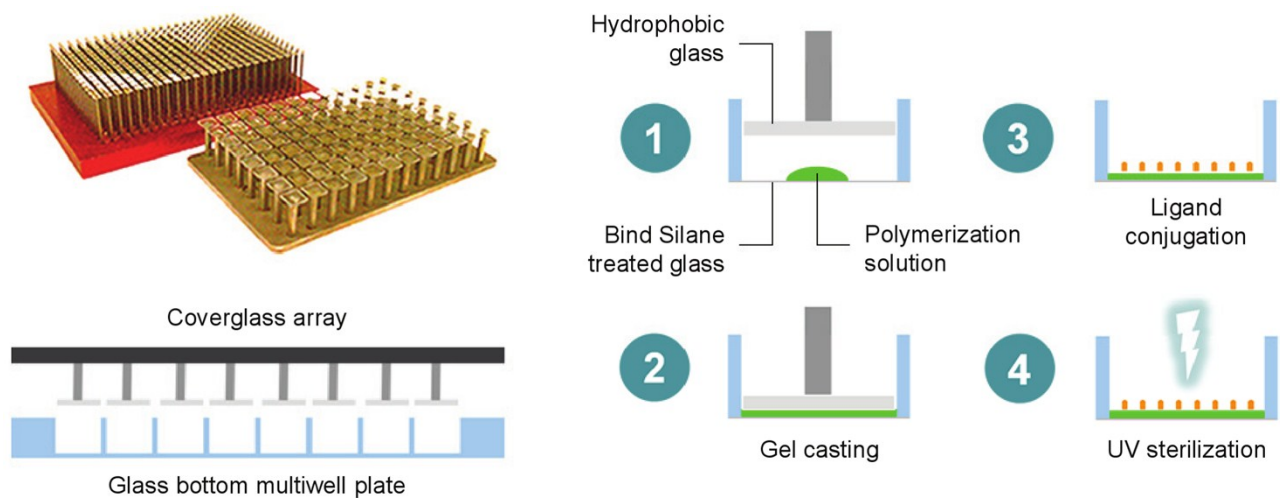

**Supplementary Table 1:** (A) From the screening of the Prestwick library, we identified 15 individual drugs that relaxed HASM cells. (B) From the screening of the Prestwick library, we identified 17 individual drugs that relaxed SC cells.

**Supplementary Table 1A:**

| Chemical name                         | Effects                         |
|---------------------------------------|---------------------------------|
| Salbutamol                            | β2-adrenergic receptor agonist  |
| Fenoterol hydrobromide                |                                 |
| Terbutaline hemisulfate               |                                 |
| Clenbuterol hydrochloride             |                                 |
| Ritodrine hydrochloride               |                                 |
| Metaproterenol sulfate                |                                 |
| Isoetharine mesylate salt             |                                 |
| (+)-Isoproterenol (+)-bitartrate salt |                                 |
| (-)-Isoproterenol hydrochloride       |                                 |
| Alprostadil                           | Known smooth muscle relaxant    |
| Ethaverine hydrochloride              |                                 |
| Kaempferol                            |                                 |
| Chicago sky blue 6B                   | Inhibitor of L-glutamate uptake |
| Terconazole                           | Anti-fungal medication          |
| Levonordefrin                         | Vasoconstrictor                 |

**Supplementary Table 1B:**

| Chemical name                         | Effects                                                          |
|---------------------------------------|------------------------------------------------------------------|
| Salbutamol                            | β2-adrenergic receptor agonist                                   |
| Fenoterol hydrobromide                |                                                                  |
| Terbutaline hemisulfate               |                                                                  |
| Clenbuterol hydrochloride             |                                                                  |
| Ritodrine hydrochloride               |                                                                  |
| Metaproterenol sulfate                |                                                                  |
| Isoetharine mesylate salt             |                                                                  |
| (+)-Isoproterenol (+)-bitartrate salt |                                                                  |
| (-)-Isoproterenol hydrochloride       |                                                                  |
| Pepstatin A                           | Inhibitor of aspartyl proteases, inhibits phosphorylation of ERK |
| Cyclosporin A                         | Immunosuppressant drug in organ transplantation                  |
| Clioquinol                            | Antifungal drug and antiprotozoal drug                           |
| Chicago sky blue 6B                   | Inhibitor of L-glutamate uptake                                  |
| Terconazole                           | Anti-fungal medication                                           |
| Levonordefrin                         | Topical nasal decongestant and vasoconstrictor in dentistry      |
| Sanguinarine                          | Toxin                                                            |
| Alprostadil                           | Prostaglandin E1, known bronchodilator and vasodilator           |

**Supplementary Table 2:** Supplementary Table 2 is the expanded version of Supplementary Table 1. (A) From the screening of the Prestwick library, we chose 16 mixtures as positives and retested drugs individually. We identified 15 individual drugs that relaxed HASM cells. (B) From the screening of the Prestwick library, we chose 16 mixtures as positives and retested drugs individually. We identified 17 individual drugs that relaxed SC cells.

**Supplementary Table 2A:**

| Chemical name                             | fmIa structure   | Mol weight | Force response | Chemical name                                 | fmIa structure | Mol weight | Force response |
|-------------------------------------------|------------------|------------|----------------|-----------------------------------------------|----------------|------------|----------------|
| (-)-Isoproterenol hydrochloride           | C11H18ClNO3      | 247.72     | ↓              | Hymecromone                                   | C10H8O3        | 176.17     | –              |
| (+)-Isoproterenol (+)-bitartrate salt     | C15H23NO9        | 361.35     | ↓              | Isoetharine mesylate salt                     | C14H25NO6S     | 335.42     | ↓              |
| (+,-)-Synephrine                          | C9H13NO2         | 167.21     | –              | Kaempferol                                    | C15H10O6       | 286.24     | ↓              |
| 2-Chloropyrazine                          | C4H3ClN2         | 114.53     | –              | Ketotifen fumarate                            | C23H23NO5S     | 425.51     | –              |
| 3-Acetylcoumarin                          | C11H8O3          | 188.18     | –              | Levonordefrin                                 | C9H13NO3       | 183.21     | ↓              |
| 6-Hydroxytropinone                        | C8H13NO2         | 155.20     | –              | Lidoflazine                                   | C30H35F2N3O    | 491.63     | –              |
| Alprostadil                               | C20H34O5         | 354.49     | ↓              | Lincomycin hydrochloride                      | C18H35ClN2O6S  | 443.01     | –              |
| Ascorbic acid                             | C6H8O6           | 176.13     | –              | Mephesisin                                    | C10H14O3       | 182.22     | –              |
| Aspartic acid, N-acetyl (R,S)             | C6H9NO5          | 175.14     | –              | Mephénytoin                                   | C12H14N2O2     | 218.26     | –              |
| Azaperone                                 | C19H22FN3O       | 327.41     | –              | Metaproterenol sulfate, orciprenaline sulfate | C22H36N2O10S   | 520.60     | ↓              |
| Bambuterol hydrochloride                  | C18H30ClN3O5     | 403.91     | –              | Methacholine chloride                         | C8H18ClNO2     | 195.69     | –              |
| Benzathine benzylpenicillin               | C48H56N6O10S2    | 941.14     | –              | Methyldopate hydrochloride                    | C12H18ClNO4    | 275.73     | –              |
| Cefaclor                                  | C15H16ClN3O5S    | 385.83     | –              | N-Acetyl-L-leucine                            | C8H15NO3       | 173.21     | –              |
| Cefepime hydrochloride                    | C19H27ClN6O6S2   | 535.04     | –              | Niacin                                        | C6H5NO2        | 123.11     | –              |
| Chicago sky blue 6B                       | C34H24N6Na4O16S4 | 992.82     | ↓              | Nitrendipine                                  | C18H20N2O6     | 360.37     | –              |
| Chlorpheniramine maleate                  | C20H23ClN2O4     | 390.87     | –              | Nitrofurantoin                                | C8H6N4O5       | 238.16     | –              |
| Clenbuterol hydrochloride                 | C12H19Cl3N2O     | 313.66     | ↓              | Pentolinium bitartrate                        | C23H42N2O12    | 538.60     | –              |
| Clioquinol                                | C9H5ClINO        | 305.50     | –              | Pepstatin A                                   | C34H63N5O9     | 685.91     | –              |
| Cyclopentolate hydrochloride              | C17H26ClNO3      | 327.85     | –              | Ramipril                                      | C23H32N2O5     | 416.52     | –              |
| Cyclosporin A                             | C62H111N11O12    | 1202.64    | –              | Ritodrine hydrochloride                       | C17H22ClNO3    | 323.82     | ↓              |
| Dextromethorphan hydrobromide monohydrate | C18H28BrNO2      | 370.33     | –              | Ronidazole                                    | C6H8N4O4       | 200.16     | –              |
| Diazoxide                                 | C8H7ClN2O2S      | 230.67     | –              | Salbutamol                                    | C13H21NO3      | 239.32     | ↓              |
| Disulfiram                                | C10H20N2S4       | 296.54     | –              | Sanguinarine                                  | C20H14NO4      | 332.34     | –              |
| Dubininine                                | C15H17NO4        | 275.31     | –              | Sulfanilamide                                 | C6H8N2O2S      | 172.21     | –              |
| Fenoterol hydrobromide                    | C17H22BrNO4      | 384.27     | ↓              | Tacrine hydrochloride hydrate                 | C13H15ClN2     | 234.73     | –              |
| Flunarizine dihydrochloride               | C26H28Cl2F2N2    | 477.43     | –              | Terbutaline hemisulfate                       | C24H40N2O10S   | 548.66     | ↓              |
| Fluspirilen                               | C29H31F2N3O      | 475.59     | –              | Terconazole                                   | C26H31Cl2N5O3  | 532.47     | ↓              |
| Fluticasone propionate                    | C25H31F3O5S      | 500.58     | –              | Tomatine                                      | C50H83NO21     | 1034.21    | –              |
| Gabexate mesilate                         | C17H27N3O7S      | 417.48     | –              | Trazodone hydrochloride                       | C19H23Cl2N5O   | 408.33     | –              |
| Guanfacine hydrochloride                  | C9H10Cl3N3O      | 282.56     | –              | Trimethadione                                 | C6H9NO3        | 143.14     | –              |
| Hycanthone                                | C20H24N2O2S      | 356.49     | –              | Verteporfin                                   | C41H44N4O9     | 736.83     | –              |
| Hymecromone                               | C10H8O3          | 176.17     | –              | Zaprinast                                     | C13H13N5O2     | 271.28     | –              |
| Isoetharine mesylate salt                 | C14H25NO6S       | 335.42     | ↓              | Zardaverine                                   | C12H10F2N2O3   | 268.22     | –              |

**Supplementary Table 2B:**

| Chemical name                             | Formula          | Mol weight | Force Response | Chemical name                                | Formula        | Mol weight | Force Response |
|-------------------------------------------|------------------|------------|----------------|----------------------------------------------|----------------|------------|----------------|
| (-)-Isoproterenol hydrochloride           | C11H18ClNO3      | 247.72     | ↓              | Isoetharine mesylate salt                    | C14H25NO6S     | 335.42     | ↓              |
| (+)-Isoproterenol (+)-bitartrate salt     | C15H23NO9        | 361.35     | ↓              | Kaempferol                                   | C15H10O6       | 286.24     | -              |
| (+,-)-Synephrine                          | C9H13NO2         | 167.21     | -              | Ketotifen fumarate                           | C23H23NO5S     | 425.51     | -              |
| 2-Chloropyrazine                          | C4H3ClN2         | 114.53     | -              | Levonordefrin                                | C9H13NO3       | 183.21     | ↓              |
| 3-Acetylcoumarin                          | C11H8O3          | 188.18     | -              | Lidoflazine                                  | C30H35F2N3O    | 491.63     | -              |
| 6-Hydroxytropinone                        | C8H13NO2         | 155.20     | -              | Lincomycin hydrochloride                     | C18H35ClN2O6S  | 443.01     | -              |
| Alprostadiil                              | C20H34O5         | 354.49     | ↓              | Mephenesin                                   | C10H14O3       | 182.22     | -              |
| Aminophylline                             | C16H24N10O4      | 420.43     | -              | Mephénytoin                                  | C12H14N2O2     | 218.26     | -              |
| Ascorbic acid                             | C6H8O6           | 176.13     | -              | Metaproterenol sulfate orciprenaline sulfate | C22H36N2O10S   | 520.60     | ↓              |
| Aspartic acid, N-acetyl (R,S)             | C6H9NO5          | 175.14     | -              | Methacholine chloride                        | C8H18ClNO2     | 195.69     | -              |
| Azaperone                                 | C19H22FN3O       | 327.41     | -              | Methyldopate hydrochloride                   | C12H18ClNO4    | 275.73     | -              |
| Bambuterol hydrochloride                  | C18H30ClN3O5     | 403.91     | -              | N-Acetyl-L-leucine                           | C8H15NO3       | 173.21     | -              |
| Benzathine benzylpenicillin               | C48H56N6O10S2    | 941.14     | -              | Niacin                                       | C6H5NO2        | 123.11     | -              |
| Cefaclor                                  | C15H16ClN3O5S    | 385.83     | -              | Nitrendipine                                 | C18H20N2O6     | 360.37     | -              |
| Cefepime hydrochloride                    | C19H27ClN6O6S2   | 535.04     | -              | Nitrofurantoin                               | C8H6N4O5       | 238.16     | -              |
| Chicago sky blue 6B                       | C34H24N6Na4O16S4 | 992.82     | ↓              | Pentolinium bitartrate                       | C23H42N2O12    | 538.60     | -              |
| Clenbuterol hydrochloride                 | C12H19Cl3N2O     | 313.66     | ↓              | Pepstatin A                                  | C34H63N5O9     | 685.91     | ↓              |
| Clioquinol                                | C9H5ClINO        | 305.50     | ↓              | Phentolamine hydrochloride                   | C17H20ClN3O    | 317.82     | -              |
| Cyclosporin A                             | C62H111N11O12    | 1202.64    | ↓              | Proglumide                                   | C18H26N2O4     | 334.42     | -              |
| Dextromethorphan hydrobromide monohydrate | C18H28BrNO2      | 370.33     | -              | Ramipril                                     | C23H32N2O5     | 416.52     | -              |
| Ethaverine hydrochloride                  | C24H30ClNO4      | 431.96     | -              | Ritodrine hydrochloride                      | C17H22ClNO3    | 323.82     | ↓              |
| Ethopropazine hydrochloride               | C19H25ClN2S      | 348.94     | -              | Salbutamol                                   | C13H21NO3      | 239.32     | ↓              |
| Fenbendazole                              | C15H13N3O2S      | 299.35     | -              | Sanguinarine                                 | C20H14NO4      | 332.34     | ↓              |
| Fenoterol hydrobromide                    | C17H22BrNO4      | 384.27     | ↓              | Sulconazole nitrate                          | C18H16Cl3N3O3S | 460.77     | -              |
| Flunarizine dihydrochloride               | C26H28Cl2F2N2    | 477.43     | -              | Sulfanilamide                                | C6H8N2O2S      | 172.21     | -              |
| Fluspirilen                               | C29H31F2N3O      | 475.59     | -              | Tacrine hydrochloride hydrate                | C13H15ClN2     | 234.73     | -              |
| Fluticasone propionate                    | C25H31F3O5S      | 500.58     | -              | Terbutaline hemisulfate                      | C24H40N2O10S   | 548.66     | ↓              |
| Gabexate mesilate                         | C17H27N3O7S      | 417.48     | -              | Terconazole                                  | C26H31Cl2N5O3  | 532.47     | ↓              |
| Guanfacine hydrochloride                  | C9H10Cl3N3O      | 282.56     | -              | Trazodone hydrochloride                      | C19H23Cl2N5O   | 408.33     | -              |
| Hycanthone                                | C20H24N2O2S      | 356.49     | -              | Trimethadione                                | C6H9NO3        | 143.14     | -              |
| Hymecromone                               | C10H8O3          | 176.17     | -              | Zaprinast                                    | C13H13N5O2     | 271.28     | -              |
| Indapamide                                | C16H16ClN3O3S    | 365.84     | -              | Zardaverine                                  | C12H10F2N2O3   | 268.22     | -              |

## References

1. Zhang, X.D., *A pair of new statistical parameters for quality control in RNA interference high-throughput screening assays*. Genomics, 2007. **89**(4): p. 552-61.
2. Birmingham, A., et al., *Statistical methods for analysis of high-throughput RNA interference screens*. Nature methods, 2009. **6**(8): p. 569-75.
3. Iversen, P.W., et al., *HTS Assay Validation*, in *Assay Guidance Manual*, G.S. Sittampalam, et al., Editors. 2004: Bethesda (MD).
4. An, W.F. and N. Tolliday, *Cell-based assays for high-throughput screening*. Molecular biotechnology, 2010. **45**(2): p. 180-6.
5. Mih, J.D., et al., *A multiwell platform for studying stiffness-dependent cell biology*. PloS one, 2011. **6**(5): p. e19929.
